# Supplementary material for: The FER rs4957796 TT genotype is associated with unfavorable 90-day survival in Caucasian patients with severe ARDS due to pneumonia
Source: PubMed Central journal article supplement (PMC5575093; doi:10.1038/s41598-017-08540-7), 2017-08-29
Supplement: 41598_2017_8540_MOESM1_ESM.pdf [file 41598_2017_8540_MOESM1_ESM.pdf]

## Supplementary information

### **The FER rs4957796 TT genotype is associated with unfavorable 90-day survival in Caucasian patients with severe ARDS due to pneumonia**

José Hinz, MD, PhD<sup>1§</sup>, Benedikt Büttner, MD<sup>1§</sup>, Fabian Kriesel, MD<sup>1</sup>, Maximilian Steinau, MD<sup>1</sup>, Aron Frederik Popov, MD, PhD, <sup>2,3</sup>, Michael Ghadimi, MD, PhD<sup>4</sup>, Tim Beissbarth, PhD<sup>5</sup>, Mladen Tzvetkov, PhD<sup>6</sup>, Ingo Bergmann, MD, PhD<sup>1§</sup>, and Ashham Mansur, MD, PhD<sup>\*1§</sup>

<sup>1</sup>Department of Anaesthesiology, University Medical Centre, Georg August University, Robert-Koch-Str.40, D-37075 Goettingen, Germany

<sup>2</sup>Department of Cardiothoracic Transplantation & Mechanical Support, Royal Brompton and Harefield Hospital, Harefield, Hill End Road, UB9 6JH London, United Kingdom

<sup>3</sup>Department of Cardiothoracic and Vascular Surgery, University of Frankfurt, Theodor-Stern-Kai 7, D-60590 Frankfurt, Germany

<sup>4</sup>Department of General and Visceral Surgery, University Medical Centre, Georg August University, D-37075 Goettingen, Germany

<sup>5</sup>Department of Medical Statistics, University Medical Centre, Georg August University, Robert-Koch-Str.40, D-37075 Goettingen, Germany

<sup>6</sup>Institute of Clinical Pharmacology, University Medical Center, Georg August University, Goettingen, Germany

<sup>§</sup>Equal contribution

## 1. Baseline Characteristica – mild ARDS

| Parameter                                                        | All<br>(n=30) | Severe ARDS       |               | p value |
|------------------------------------------------------------------|---------------|-------------------|---------------|---------|
|                                                                  |               | T/C+C/C<br>(n=13) | T/T<br>(n=17) |         |
| Age, years                                                       | 61±15         | 61±17             | 61±14         | 1.0000  |
| Male [%]                                                         | 77            | 77                | 76            | 0.9768  |
| Body Mass Index                                                  | 26±5          | 27±7              | 26±3          | 0.4898  |
| <b>Severity of sepsis</b>                                        |               |                   |               |         |
| Sepsis/severe sepsis, %                                          | 37            | 38                | 35            | 0.8584  |
| Septic shock, %                                                  | 63            | 62                | 65            |         |
| Sequential Organ Failure Assessment score                        | 6.6±2.8       | 6.8±2.6           | 6.5±3.1       | 0.9068  |
| Acute Physiology and Chronic Health Evaluation (APACHE II) score | 17.4±5.5      | 17.7±5.6          | 17.1±5.6      | 0.8667  |
| <b>Comorbidities [%]</b>                                         |               |                   |               |         |
| Hypertension                                                     | 43            | 38                | 47            | 0.6377  |
| History of myocardial infarction                                 | 3             | 0                 | 6             | 0.3738  |
| Chronic obstructive pulmonary disease                            | 23            | 23                | 24            | 0.9768  |
| Renal dysfunction                                                | 13            | 15                | 12            | 0.7726  |
| Noninsulin-dependent diabetes mellitus                           | 0             | 0                 | 0             | 1.0000  |
| Insulin-dependent diabetes mellitus                              | 0             | 0                 | 0             | 1.0000  |
| Chronic liver disease                                            | 3             | 0                 | 6             | 0.3738  |
| History of cancer                                                | 13            | 23                | 6             | 0.1700  |
| History of stroke                                                | 0             | 0                 | 0             | 1.0000  |
| <b>Recent surgical history[%]</b>                                |               |                   |               | 0.9741  |
| Elective surgery                                                 | 30            | 30                | 29            |         |
| Emergency Surgery                                                | 63            | 62                | 65            |         |
| No History of Surgery                                            | 7             | 8                 | 6             |         |
| <b>Organ support [%]</b>                                         |               |                   |               |         |
| Used during observation period                                   |               |                   |               |         |
| Mechanical ventilation                                           | 97            | 100               | 94            | 0.3738  |
| Use of vasopressor                                               | 63            | 62                | 65            | 0.8584  |
| Renal replacement therapy                                        | 0             | 0                 | 0             | 1.0000  |
| Used on sepsis onset                                             |               |                   |               |         |
| Mechanical ventilation                                           | 83            | 100               | 70            | 0.0322  |
| Use of vasopressor                                               | 0             | 0                 | 0             | 1.0000  |
| Renal replacement therapy                                        | 47            | 38                | 53            | 0.4308  |
|                                                                  |               |                   |               |         |
| Use of Statins[%]                                                | 27            | 23                | 29            | 0.6974  |

## 2. Baseline Characteristica – moderate ARDS

| Parameter                                                              | All<br>(n=149) | Severe ARDS       |                | p value |
|------------------------------------------------------------------------|----------------|-------------------|----------------|---------|
|                                                                        |                | T/C+C/C<br>(n=49) | T/T<br>(n=100) |         |
| Age, years                                                             | 62±16          | 64±17             | 61±15          | 0.0783  |
| Male [%]                                                               | 67             | 61                | 70             | 0.2841  |
| Body Mass Index                                                        | 27±7           | 27±4              | 28±8           | 0.6776  |
| <b>Severity of sepsis</b>                                              |                |                   |                |         |
| Sepsis/severe sepsis, %                                                | 25             | 29                | 24             | 0.5476  |
| Septic shock, %                                                        | 75             | 71                | 76             |         |
| Sequential Organ Failure<br>Assessment score                           | 9.3±3.4        | 9.7±3.6           | 9.1±3.3        | 0.4186  |
| Acute Physiology and<br>Chronic Health Evaluation<br>(APACHE II) score | 21.5±6.0       | 22.4±5.4          | 21.0±6.2       | 0.2504  |
| <b>Comorbidities [%]</b>                                               |                |                   |                |         |
| Hypertension                                                           | 56             | 65                | 51             | 0.0986  |
| History of myocardial<br>infarction                                    | 9              | 10                | 9              | 0.8129  |
| Renal dysfunction                                                      | 11             | 8                 | 12             | 0.4773  |
| Noninsulin-dependent<br>diabetes mellitus                              | 11             | 10                | 12             | 0.7460  |
| Insulin-dependent diabetes<br>mellitus                                 | 11             | 10                | 11             | 0.8828  |
| Chronic liver disease                                                  | 5              | 2                 | 6              | 0.2833  |
| History of cancer                                                      | 12             | 8                 | 14             | 0.3044  |
| History of stroke                                                      | 6              | 8                 | 5              | 0.4464  |
| <b>Recent surgical<br/>history[%]</b>                                  |                |                   |                | 0.1579  |
| Elective surgery                                                       | 23             | 14                | 27             |         |
| Emergency Surgery                                                      | 58             | 61                | 57             |         |
| No History of Surgery                                                  | 19             | 25                | 16             |         |
| <b>Organ support [%]</b>                                               |                |                   |                |         |
| Used during observation<br>period                                      |                |                   |                |         |
| Mechanical ventilation                                                 | 99             | 100               | 99             | 0.4825  |
| Use of vasopressor                                                     | 75             | 71                | 76             | 0.5476  |
| Renal replacement therapy                                              | 16             | 16                | 16             | 0.9594  |
| Used on sepsis onset                                                   |                |                   |                |         |
| Mechanical ventilation                                                 | 92             | 94                | 91             | 0.5443  |
| Use of vasopressor                                                     | 62             | 63                | 61             | 0.7892  |
| Renal replacement therapy                                              | 8              | 6                 | 9              | 0.5443  |
|                                                                        |                |                   |                |         |
| Use of Statins[%]                                                      | 33             | 43                | 28             | 0.0698  |

### 3. Cox Regression – mild ARDS\*

| Variable                                                   | Hazard ratio | 95 % CI       | <i>p</i> value |
|------------------------------------------------------------|--------------|---------------|----------------|
| Age                                                        | 1.20         | 0.98-1.47     | 0.0774         |
| Male gender                                                | 30.58        | 0.03-35797.31 | 0.3427         |
| Body mass index                                            | 0.59         | 0.24-1.48     | 0.2636         |
| Sequential Organ Failure Assessment                        | 0.43         | 0.15-1.27     | 0.1263         |
| Acute Physiology and Chronic Health Evaluation (APACHE II) | 1.18         | 0.81-1.75     | 0.3756         |
| No statin therapy                                          | 0.00         | 0.00-24.00    | 0.2083         |
| T/T Genotype                                               | 1.65         | 0.06-45.82    | 0.7690         |

\*To exclude the effects of potential confounders (age, gender and body mass index (BMI), and morbidity scores (SOFA and APACHE II), statin therapy<sup>25</sup> and covariates that varied at baseline (differently distributed comorbidities with *p*-values < 0.1) on survival, we performed a multivariate Cox regression analysis to examine the survival time

### 4. Cox Regression – moderat ARDS\*

| Variable                                                   | Hazard ratio | 95 % CI   | <i>p</i> value |
|------------------------------------------------------------|--------------|-----------|----------------|
| Age                                                        | 1.09         | 1.05-1.14 | 0.0001         |
| Male gender                                                | 0.42         | 0.17-1.02 | 0.0549         |
| Body mass index                                            | 1.00         | 0.95-1.07 | 0.8826         |
| Sequential Organ Failure Assessment                        | 1.16         | 1.05-1.28 | 0.0023         |
| Acute Physiology and Chronic Health Evaluation (APACHE II) | 1.02         | 0.96-1.09 | 0.4483         |
| Hypertension                                               | 1.54         | 0.67-3.50 | 0.3073         |
| No statin therapy                                          | 1.00         | 0.46-2.19 | 0.9984         |
| T/T Genotype                                               | 0.64         | 0.30-1.40 | 0.2686         |

\*To exclude the effects of potential confounders (age, gender and body mass index (BMI), and morbidity scores (SOFA and APACHE II), statin therapy<sup>25</sup> and covariates that varied at baseline (differently distributed comorbidities with *p*-values < 0.1) on survival, we performed a multivariate Cox regression analysis to examine the survival time

## 5. Disease severity – mild ARDS (Adjusted)

Linear regression – with Age, sex, BMI, SOFA\_d1, Apache, Statin and rs4957796 genotype.

| Variable                          | All          | mild ARDS    |             | p Value |
|-----------------------------------|--------------|--------------|-------------|---------|
|                                   |              | T/C C/C      | T/T         |         |
|                                   | (n=30)       | (n=13)       | (n=17)      |         |
| SOFA                              | 4.5±1.6      | 4.6±1.6      | 4.5±1.7     | 0.5388  |
| SOFA-Respiratory score            | 1.4±0.5      | 1.4±0.5      | 1.4±0.4     | 0.7511  |
| SOFA-Cardiovascular score         | 1.1±0.7      | 1.1±0.6      | 1.1±0.8     | 0.8524  |
| SOFA-Central nervous system score | 1.6±1.2      | 1.6±1.1      | 1.6±1.3     | 0.7037  |
| SOFA-Renal score                  | 0.3±0.6      | 0.3±0.5      | 0.3±0.6     | 0.9530  |
| SOFA-Coagulation score            | 0.1±0.3      | 0.1±0.3      | 0.1±0.3     | 0.8360  |
| SOFA-Hepatic score                | 0.1±0.4      | 0.1±0.4      | 0.1±0.4     | 0.7274  |
| Length of stay in ICU days        | 12±10        | 12±8         | 12±11       | 0.8904  |
| 28-day mortality (%)              | 17           | 8            | 24          | 0.2228  |
| <b>Organ support-free days</b>    |              |              |             |         |
| Ventilator-free days              | 4±5          | 4±5          | 5±5         | 0.6643  |
| Dialysis-free days                | 11±7         | 12±8         | 11±7        | 0.8904  |
| Vasopressor-free days             | 10±7         | 10±7         | 9±7         | 0.8871  |
| ECMO-free days                    | 11±7         | 12±8         | 11±7        | 0.8904  |
| <b>Inflammatory values</b>        |              |              |             |         |
| Leucocytes (1000/μl)              | 12±5         | 11±4         | 13±6        | 0.5651  |
| CRP (mg/l)                        | 162±126 (9)  | 208±192 (3)  | 139±93 (6)  | n.a.    |
| Procalcitonin (ng/dl)             | 1.6±5.1 (27) | 3.3±8.2 (10) | 0.7±1.0     | 0.1612  |
| <b>Kidney values</b>              |              |              |             |         |
| Urine output (ml/day)             | 3055±729     | 2928±788     | 3153±688    | 0.2469  |
| Urine output (ml/kg/hr)           | 1.6±0.5      | 1.5±0.5      | 1.7±0.4     | 0.5077  |
| Creatinine (mg/dl)                | 0.9±0.5      | 0.9±0.5      | 0.9±0.6     | 0.9903  |
| <b>Liver values</b>               |              |              |             |         |
| AST (GOT) (IU/l)                  | 85±114 (10)  | 43±30 (4)    | 112±144 (6) | 0.1986  |
| ALT (GPT) (IU/l)                  | 79±101 (29)  | 58±36        | 96±132 (16) | 0.2145  |
| Bilirubin (mg/dl)                 | 0.7±0.5      | 0.6±0.4      | 0.7±0.5     | 0.5254  |

## 6. Disease severity – moderate ARDS (Adjusted)

Linear regression – with Age, sex, BMI, SOFA\_d1, Apache, Statin, Hypertension (varied comorbidity at baseline) and rs4957796 genotype.

| Variable                          | All           | mild ARDS    |              | p Value |
|-----------------------------------|---------------|--------------|--------------|---------|
|                                   |               | T/C C/C      | T/T          |         |
|                                   | (n=149)       | (n=49)       | (n=100)      |         |
| SOFA                              | 6.5±2.6       | 6.7±2.3      | 6.4±2.7      | 0.9100  |
| SOFA-Respiratory score            | 2.0±0.6       | 2.0±0.6      | 1.9±0.6      | 0.6267  |
| SOFA-Cardiovascular score         | 1.3±0.8       | 1.3±0.7      | 1.3±0.9      | 0.4835  |
| SOFA-Central nervous system score | 2.0±1.0       | 2.2±0.9      | 2.0±1.0      | 0.3704  |
| SOFA-Renal score                  | 0.8±1.1       | 0.8±1.3      | 0.7±1.1      | 0.9333  |
| SOFA-Coagulation score            | 0.2±0.4       | 0.2±0.4      | 0.2±0.5      | 0.6426  |
| SOFA-Hepatic score                | 0.2±0.5       | 0.2±0.4      | 0.2±0.5      | 0.2953  |
| Length of stay in ICU days        | 16±8          | 15±8         | 16±8         | 0.6151  |
| 28-day mortality (%)              | 15            | 12           | 17           | 0.1871  |
| <b>Organ support-free days</b>    |               |              |              |         |
| Ventilator-free days              | 5±5           | 4±4          | 5±5          | 0.7034  |
| Dialysis-free days                | 14±8          | 14±8         | 15±8         | 0.5937  |
| Vasopressor-free days             | 12±7          | 11±7         | 12±7         | 0.6733  |
| ECMO-free days                    | 15±8          | 15±8         | 15±8         | 0.5753  |
| <b>Inflammatory values</b>        |               |              |              |         |
| Leucocytes (1000/μl)              | 12±4          | 11±3         | 13±4         | 0.0206  |
| CRP (mg/l)                        | 138±90 (51)   | 122±94 (15)  | 145±89 (36)  | 0.9442  |
| Procalcitonin (ng/dl)             | 2.5±7.0 (130) | 3.2±6.9 (45) | 2.1±7.0 (85) | 0.5102  |
| <b>Kidney values</b>              |               |              |              |         |
| Urine output (ml/day)             | 2882±1249     | 2922±1155    | 2863±1298    | 0.3192  |
| Urine output (ml/kg/hr)           | 1.6±0.8       | 1.6±0.8      | 1.5±0.9      | 0.5337  |
| Creatinine (mg/dl)                | 1.2±1.0       | 1.4±1.3      | 1.2±0.8      | 0.1127  |
| <b>Liver values</b>               |               |              |              |         |
| AST (GOT) (IU/l)                  | 115±210 (80)  | 169±354 (21) | 96±125 (59)  | 0.2890  |
| ALT (GPT) (IU/l)                  | 79±125 (145)  | 80±178       | 79±87 (96)   | 0.9813  |
| Bilirubin (mg/dl)                 | 0.8±0.9       | 0.8±1.0      | 0.8±0.9      | 0.7605  |

## 7. Disease severity – severe ARDS (Adjusted).

Linear regression – with Age, sex, BMI, SOFA\_d1, Apache, Statin, History of stroke (varied comorbidity at baseline) and rs4957796 genotype.

| Variable                          | All           | Severe ARDS  |               | p Value |
|-----------------------------------|---------------|--------------|---------------|---------|
|                                   |               | T/C C/C      | T/T           |         |
|                                   | (n=95)        | (n=27)       | (n=68)        |         |
| SOFA                              | 8.6±3.7       | 7.8±2.9      | 8.9±3.9       | 0.1927  |
| SOFA-Respiratory score            | 2.6±0.5       | 2.5±0.6      | 2.6±0.5       | 0.2433  |
| SOFA-Cardiovascular score         | 1.8±1         | 1.7±0.9      | 1.9±1.1       | 0.6632  |
| SOFA-Central nervous system score | 2.4±1         | 2.1±1        | 2.5±0.9       | 0.0909  |
| SOFA-Renal score                  | 0.8±1         | 0.8±0.8      | 0.8±1.1       | 0.6701  |
| SOFA-Coagulation score            | 0.4±0.6       | 0.2±0.4      | 0.5±0.7       | 0.0680  |
| SOFA-Hepatic score                | 0.3±0.7       | 0.4±0.6      | 0.3±0.7       | 0.7948  |
| Length of stay in ICU days        | 21±16         | 19±12        | 22±18         | 0.2269  |
| 28-day mortality (%)              | 29            | 11           | 37            | 0.0349  |
| <b>Organ support-free days</b>    |               |              |               |         |
| Ventilator-free days              | 2±3           | 3±2          | 2±3           | 0.4343  |
| Dialysis-free days                | 15±8          | 15±7         | 16±8          | 0.3880  |
| Vasopressor-free days             | 10±7          | 10±5         | 10±7          | 0.3774  |
| ECMO-free days                    | 16±9          | 16±8         | 15±9          | 0.8785  |
| <b>Inflammatory values</b>        |               |              |               |         |
| Leucocytes (1000/μl)              | 13±4          | 12±3         | 13±4          | 0.1942  |
| CRP (mg/l)                        | 164±107 (35)  | 113±86 (8)   | 179±110 (27)  | 0.4006  |
| Procalcitonin (ng/dl)             | 4.4±10.9 (90) | 3.2±7.6 (24) | 4.9±11.9 (66) | 0.7463  |
| <b>Kidney values</b>              |               |              |               |         |
| Urine output (ml/day)             | 2955±1264     | 3388±1267    | 2783±1231     | 0.0698  |
| Urine output (ml/kg/hr)           | 1.4±0.7       | 1.7±0.7      | 1.3±0.6       | 0.0269  |
| Creatinine (mg/dl)                | 1.2±0.7       | 1.3±0.7      | 1.2±0.7       | 0.6870  |
| <b>Liver values</b>               |               |              |               |         |
| AST (GOT) (IU/l)                  | 426±1430 (60) | 296±588 (14) | 465±1605 (46) | 0.7366  |
| ALT (GPT) (IU/l)                  | 124±243 (93)  | 157±329      | 111±199 (66)  | 0.4093  |
| Bilirubin (mg/dl)                 | 1.4±2.9       | 1.1±1.4      | 1.6±3.3       | 0.5769  |

## Supplementary Figure 1

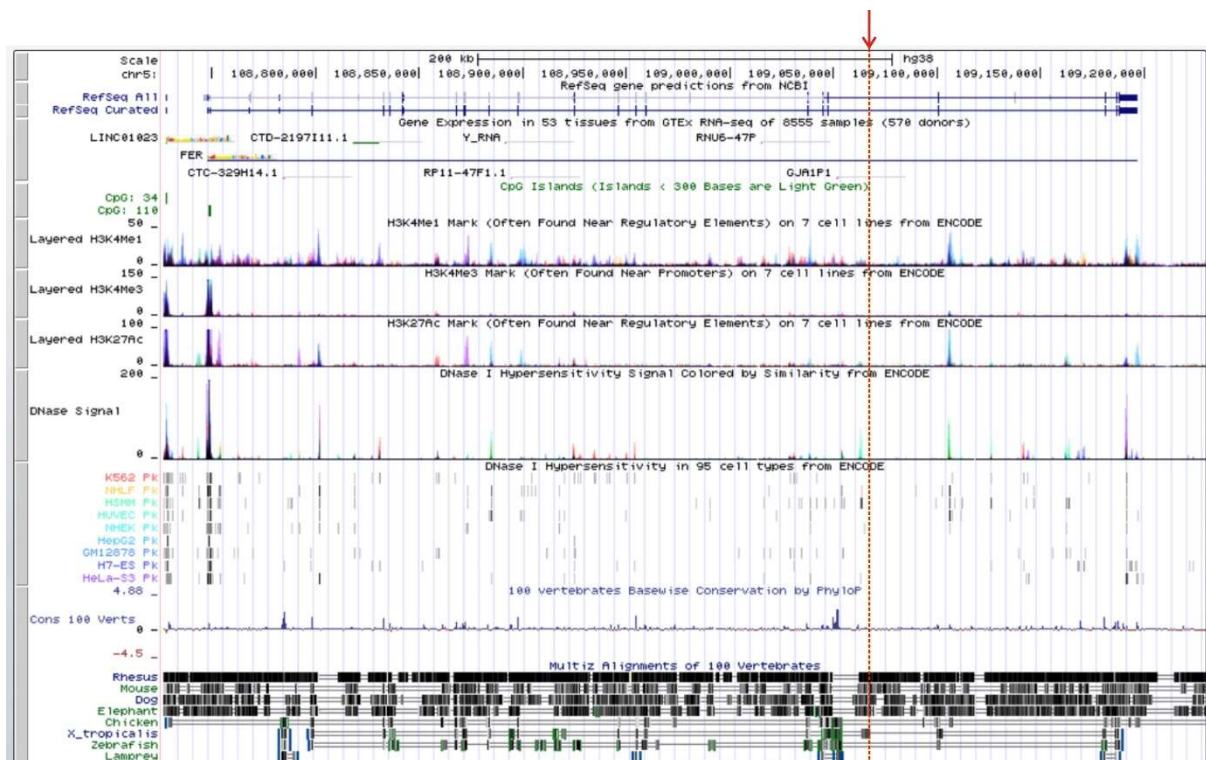

**Supplementary figure 1.** The figure shows the localization of the rs4957796 polymorphism (indicated with red arrow) within the FER gene and in relation to the known regions of histone modifications, DNase hypersensitivity, and interspecies conservation. The data were generated from the ENCODE Integrated Regulation track and Vertebrate Conservation track for the human genome reference sequence GRCh38/hg38; visualized using the UCSC browser (<https://genome.ucsc.edu>).
